1           **Template switching mechanism drives the tandem amplification of**  
2           **chromosome 20q11.21 in human pluripotent stem cells**

3

4 Jason A Halliwell<sup>1</sup>, Duncan Baker<sup>2</sup>, Kim Judge<sup>3</sup>, Michael A Quail<sup>3</sup>, Karen Oliver<sup>3</sup>,  
5 Emma Betteridge<sup>3</sup>, Jason Skelton<sup>3</sup>, Peter W Andrews<sup>1</sup>, Ivana Barbaric<sup>1\*</sup>

6

7 <sup>1</sup>Department of Biomedical Science, University of Sheffield, Western Bank, Sheffield  
8 S10 2TN, UK.

9 <sup>2</sup>Sheffield Diagnostic Genetic Services, Sheffield Children's Hospital, Sheffield S10  
10 2TH, UK.

11 <sup>3</sup>Wellcome Sanger Institute, Hinxton, CB10 1SA, UK.

12

13 \*Corresponding authors

14

15 **Abstract**

16 Copy number variants (CNVs) are genomic rearrangements implicated in numerous  
17 congenital and acquired diseases, including cancer. In human pluripotent stem cells  
18 (PSC), the appearance of culture-acquired CNVs prompted concerns for their use in  
19 regenerative medicine applications. A particularly common problem in PSC is the  
20 occurrence of CNVs in the q11.21 region of chromosome 20. However, the exact  
21 mechanisms of origin of this amplicon remains elusive due to the difficulty in  
22 delineating its sequence and breakpoints. Here, we used long-range Nanopore  
23 sequencing on two examples of this CNV, present as a duplication in one and a  
24 triplication in another line. The CNVs were arranged in a head-to-tail orientation in  
25 both lines, with sequences of microhomologies flanking or overlapping both the  
26 proximal and distal breakpoints. These breakpoint signatures point to a specific  
27 mechanism of template switching in CNV formation, with surrounding *Alu* sequences  
28 likely contributing to the instability of this genomic region.

29

30

31 **Introduction**

32 Copy number variants (CNVs) are gains or losses of DNA segments ranging in size  
33 from around 50bp to several megabases<sup>1</sup>. By affecting the dosage of genes and

34 regulatory regions within the amplified or deleted sequence, CNVs underpin the  
35 aetiology of many diseases from developmental disorders to cancer<sup>1</sup>. The profound  
36 effect of the CNV acquisition on cellular phenotype has been also described in  
37 human pluripotent stem cells (PSC), which frequently gain a CNV located on  
38 chromosome 20 in the region q11.21 upon prolonged culture<sup>2-5</sup>. Once gained, the  
39 20q11.21 CNV bestows on the variant PSC attributes that provide them with a  
40 growth advantage due to resistance to apoptosis<sup>5,6</sup>. The 20q11.21 CNV is typically  
41 gained as a tandem duplication, although PSC lines with four or five copies of this  
42 CNV have been reported<sup>2,7</sup>. The length of the duplicated region is also variable  
43 between different lines and ranges from 0.6Mb to 4Mb<sup>2,7</sup>. Nonetheless, the shared  
44 overlapping region in all of the reported variants contains a dosage-sensitive gene,  
45 *BCL2L1*, which was identified as the driver gene responsible for the key phenotypic  
46 features of variant PSC<sup>5-7</sup>. The altered behaviour of PSC harbouring the 20q11.21  
47 CNV, coupled with the finding that the same CNV is a genomic hallmark of some  
48 cancers<sup>8</sup>, represents a potential impediment to the use of PSC in regenerative  
49 medicine applications and necessitates an understanding of the mechanisms  
50 governing the CNV appearance.

51 CNVs can arise as a consequence of DNA replication errors or during the process of  
52 DNA repair, with each of the implicated mechanisms of CNV formation yielding a  
53 different sequence profile within the resulting breakpoint junction<sup>1</sup>. For example,  
54 CNV formation can occur by the non-homologous end joining pathway when repair  
55 of DNA double strand breaks erroneously involves ligating the broken ends of  
56 different breaks instead of re-ligating the original site<sup>9</sup>. The editing of the broken  
57 ends prior to ligation is performed without the use of a homologous template and,  
58 consequently, the resulting breakpoint junctions in CNVs created by the non-  
59 homologous end joining typically contain random bases with no or little homology to  
60 the original sequence<sup>10,11</sup>. An alternative DNA repair mechanism implicated in CNV  
61 formation involves the non-allelic homologous recombination pathway, which drives  
62 the recombination of non-allelic genomic regions that share high sequence similarity,  
63 such as low copy repeats<sup>1</sup>. A defining feature of CNVs arising through this  
64 mechanism are long stretches of homology in the sequence flanking their  
65 breakpoints<sup>12</sup>. Finally, replication-based repair mechanisms of DNA repair, including  
66 fork stalling and template switching, and microhomology-mediated break-induced

67 replication, can create CNVs by switching the nascent DNA strand from a stalled or  
68 collapsed replication fork to another fork in its vicinity, thereby giving rise to an  
69 insertion or a deletion of a DNA segment<sup>13,14</sup>. Importantly, invasion of an alternative  
70 replication fork requires a small region of homology with the complementary strand in  
71 order to prime the DNA synthesis. Therefore, CNVs formed by replication-based  
72 repair mechanisms are characterised by the presence of microhomology within their  
73 breakpoint sequence<sup>14</sup>.

74 Although the CNV genomic sequence holds essential clues as to the mechanisms  
75 governing its formation, this information is not attainable from conventionally  
76 employed techniques for CNV detection, such as the CGH arrays, Fluorescent In  
77 Situ Hybridisation or quantitative PCR<sup>15</sup>. By contrast, next generation sequencing  
78 technology can be used to reveal the CNV sequence at the nucleotide level, with  
79 increased or decreased numbers of mapped reads across genomic regions  
80 indicating the presence of genomic amplifications or deletions, respectively<sup>16</sup>.  
81 However, sequencing of the genome using short reads (<300bp) is ill-suited for CNV  
82 detection due to the mapping ambiguity of short reads, particularly in the presence of  
83 highly homologous or repetitive sequences<sup>17</sup>. Recently, the advent of long read  
84 sequencing technologies allowed reads to be uniquely mapped to the reference  
85 genome, thus facilitating a more effective CNV detection and identification of  
86 previously cryptic CNV breakpoints<sup>18</sup>.

87 Here, we applied long-range next generation sequencing to two human PSC lines  
88 that each harbour a 20q11.21 CNV, in order to delineate the CNV breakpoint  
89 sequences, the orientation of the amplified segments and the genomic context  
90 surrounding the CNV. The amplified segments were present in a head-to-tail  
91 orientation in both of the lines and their breakpoints contained sequences of  
92 microhomology, suggesting that the replication-based template switching  
93 mechanisms were implicated in their genesis. Moreover, we identified *Alu* repetitive  
94 sequences that intersect or flank the 20q11.21 CNV breakpoints. The presence of  
95 such repetitive elements may cause inherent instability to this area of the genome,  
96 making it a particular hotspot for CNV formation.

97

## 98 **Results**

99

100 *Detection of human PSC lines with chromosome 20q11.21 CNV*

101

102 By interphase FISH analysis, the human embryonic stem cell (ESC) line MShef7-A4,  
103 a subline of MShef7<sup>19,20</sup>, and the human induced pluripotent stem cell (iPSC) line  
104 NCRM1<sup>21</sup> each exhibited a homogeneous population of cells with a tandem  
105 duplication or a triplication of the chromosome 20q11.21 region, respectively  
106 (**Supplementary Fig. 1**). To identify the approximate proximal and distal breakpoint  
107 position of the amplicon in each cell line (**Fig. 1**), we adapted our previously  
108 published qPCR-based method for assessment of copy number of target loci and we  
109 used it to assess the copy numbers of loci along the length of the q arm of  
110 chromosome 20<sup>15,22</sup>. In both cell lines, the proximal breakpoint was positioned  
111 between the centromere and the *DEFB115* gene (**Fig. 1**). In MShef7-A4, the distal  
112 breakpoint of the tandem duplication was located between the *TM9SF4* and *ASXL1*  
113 genes (**Fig. 1a, b**), whereas in NCRM1 the amplicon was smaller with the distal  
114 breakpoint positioned between the *TPX2* and *MYLK2* genes (**Fig. 1a, c**). In addition  
115 to identifying the putative breakpoints at 20q11.21, qPCR analysis revealed the  
116 presence of four copies of the amplicon in NCRM1, confirming the triplication of the  
117 chromosome 20q11.21 region in this line (**Fig. 1c**).

118

119 *Nanopore sequencing reveals the chromosome 20q11.21 breakpoint in MShef7-A4*

120

121 To identify the location of the breakpoints at a single nucleotide resolution in  
122 MShef7-A4 CNV and to determine the orientation of this tandem duplication, we  
123 performed whole-genome Oxford Nanopore sequencing on DNA extracted from the  
124 cells and aligned the sequencing reads to the hg38 human reference genome  
125 assembly<sup>23</sup>. The average read depth across chromosome 20 was 14.5 with a mean  
126 read length of 15.2 kb. We noted an increased sequencing read depth along the  
127 chromosome 20q11.21 relative to the rest of the chromosome (22.8 versus 14.5,  
128 respectively), indicative of a change in the copy number of this region (**Fig. 2a**)<sup>24,25</sup>.  
129 A distinct drop in read coverage was observed at position 32,273,600 bp of the  
130 chromosome 20 hg38 reference sequence (between *TPX2* and *MYLK2* genes),  
131 which we surmised was to be the distal breakpoint and was in agreement with the  
132 position we defined by qPCR (**Fig. 1a and 2a**). To represent reads which map to two  
133 discontinuous locations in the genome, mapping algorithms “soft-clip” reads to

134 indicate that a portion of the read in question does not map to the same position as  
135 the remainder of the read. Soft-clipping of reads therefore provides evidence of  
136 structural variation, in our case, tandem duplication, as reads which span  
137 breakpoints map to disparate regions therefore triggering soft-clipping  
138 (**Supplementary Fig. 2**)<sup>26,27</sup>. Furthermore, the soft-clipped proportion of the  
139 sequencing read at the distal breakpoint can be used to infer the orientation of the  
140 tandem duplication. We reasoned that, if the soft-clipped DNA sequence at the distal  
141 breakpoint aligns to the reference genome between the centromere and *DEFB115*  
142 gene, then these two distantly positioned DNA sequences must have been fused in a  
143 head-to-tail orientation. However, if the soft-clipped portion of reads aligns to the  
144 distal breakpoint in an inverted orientation, the duplication has occurred in a head-to-  
145 head fashion. Therefore, we performed a BLAT pairwise sequence alignment of a  
146 contig formed from the unmapped portion of the soft-clipped reads to identify their  
147 genomic location<sup>28</sup>. The contig aligned with 92% identity to a (GGAAT)<sub>n</sub>  
148 microsatellite repeat in the pericentromeric region proximal of the *DEFB115* gene,  
149 confirming the head-to-tail orientation of the tandem duplication (**Fig. 2b, c**). This  
150 microsatellite is positioned at 31,051,509-31,107,036 bp on chromosome 20, and is  
151 flanked by two unmapped regions of the reference genome. We could not locate the  
152 proximal breakpoint to a single nucleotide position, which we inferred was due to the  
153 breakpoint being located in a currently unmapped region of the reference genome,  
154 potentially in one of the regions we observed flanking the microsatellite.

155

156 To understand the mechanism of tandem duplication in MShf7-A4, we analysed the  
157 breakpoint sequences for signatures commonly observed in copy number variants.  
158 For the distal breakpoint, we analysed 500 bp of the reference genome sequence  
159 (hg38) surrounding the junction (**Fig. 2c**). As we were unable to locate the proximal  
160 breakpoint, we used the contig of the unmapped portions of the soft-clipped reads  
161 found at the distal breakpoint (**Fig. 2b, c**), which revealed a region of micro-  
162 homology (AGAATCACTTAAACC) that flanked both the proximal and distal  
163 breakpoint positions (**Fig. 2c**). By consulting the Dfam database of transposable  
164 elements, we observed that the distal region of microhomology lies within an *AluSz6*  
165 retrotransposon that spans the distal breakpoint<sup>29</sup>. These results suggest a role of  
166 microhomology in the mutational mechanism of the tandem amplification of  
167 chromosome 20 in the MShf7-A4 cell line.

168

169 *Break point mapping of a chromosome 20q11.21 tandem triplication*

170

171 We used the same sequencing approach to identify and analyse the breakpoints in  
172 the human iPSC cell line, NCRM1, which contains a tandem triplication in the  
173 20q11.21 region (**Supplementary Fig. 2**). Our Nanopore sequencing returned an  
174 average read length of 19.9 kb at a mean depth of 20.3 across chromosome 20.  
175 Consistent with our qPCR analysis, long-read sequencing identified a sole distal  
176 breakpoint at position 31,813,288 bp between the *TPX2* and *MYLK2* genes. This  
177 confirmed that both amplicon copies in NCRM1 have the same distal breakpoint  
178 position. The increased read depth associated with copy number variants was  
179 greater in NCRM1 (43.9) when compared with MShef7-A4, consistent with the  
180 triplication indicated by our PCR and FISH analyses (**Fig. 3a**). To identify the  
181 proximal breakpoint position, we performed a BLAT pairwise sequence alignment on  
182 the unmapped portions of the soft-clipped reads. Our soft-clipped sequence aligned  
183 with the reference genome at position 31,059,954 bp, within the same microsatellite  
184 that was putatively identified as the proximal breakpoint region in MShef7-A4 (**Fig.**  
185 **3b, c**). These data confirm that the tandem triplication of chromosome 20q11.21 in  
186 NCRM1 has occurred in a head-to-tail orientation, and that each amplicon was of  
187 equal length and contained the same breakpoint positions. Furthermore, we  
188 observed a common microsatellite sequence at the proximal breakpoint in both cell  
189 lines, and thus, its involvement could be complicit in the tandem amplifications that  
190 commonly occur associated with chromosome 20q11.21.

191

192 To infer the mechanism involved in the tandem triplication of chromosome 20q11.21  
193 in NCRM1, we interrogated the reference sequence at both the proximal and distal  
194 breakpoint positions. We identified multiple regions of micro-homology (TGAA and  
195 AATTGAA) that flanked both sides of the fusion junction (**Fig. 3c**). Furthermore, we  
196 consulted the Dfam database of transposable elements and identified an *AluSz6*  
197 element that was situated 9 bp downstream of the distal breakpoint (**Fig. 3b, c**). As  
198 we were unable to find an *Alu* element at the proximal breakpoint itself, it is unlikely  
199 the tandem duplication and triplication in MShef7-A4 and NCRM1, respectively, have  
200 arisen through a mechanism of *Alu-Alu* recombination. Instead, we propose that the  
201 *Alu* elements are sites of chromosome fragility, due to replication blockage<sup>30-34</sup>.

202 Repair of stalled and collapsed forks would then proceed through replication fork  
203 switching to complementary sites of microhomology, and strand invasion upstream  
204 on the same or a homologous chromosome would generate a tandem amplification  
205 (**Fig. 4**).

206

## 207 **Discussion**

208

209 The experiments reported here have revealed the breakpoints of tandem  
210 amplifications of chromosome 20q11.21 in human PSC. The distal breakpoints were  
211 all found to be located in, or close to *Alu* sequences. The proximal breakpoints were  
212 located in a pericentromeric microsatellite region close to 31 Mb on chromosome 20.  
213 In the case of NCRM1, each amplicon of the tandem triplication was of equal length  
214 with the same breakpoint positions. A detailed characterisation of the breakpoints at  
215 a single nucleotide level revealed short microhomologies that flank or overlap both  
216 the proximal and distal breakpoints. These breakpoint characteristics are like scars  
217 left by the repair mechanism that operated on the DNA lesion.

218

219 Although rare, breakpoint microhomology of between 1-4 bp long is occasionally  
220 observed with CNV formed by non-homologous end joining (NHEJ)<sup>35,36</sup>. As the  
221 microhomology at the breakpoints of our lines was larger than 7 bp we excluded  
222 classical NHEJ as the mechanism of tandem amplification. However, alternative  
223 forms of end-joining such as microhomology mediated end joining do utilize larger  
224 spans of homology or microhomology<sup>37-42</sup>. These mechanisms differ from classical  
225 NHEJ, as they do not perform blunt-end ligation and instead utilise end-resection at  
226 DNA breaks to reveal overlapping micro-homologous single stranded DNA required  
227 for annealing<sup>43</sup>. We eliminated alternative end-joining from the potential mutagenic  
228 mechanisms, as the microhomology in both MShef7 and NCRM1 was intact and  
229 tandem amplifications are not readily explained by this mechanism<sup>44</sup>.

230

231 The tandem amplifications in MShef7 and NCRM1 had breakpoints devoid of large  
232 regions of sequence homology, which ruled out mechanisms involving homologous  
233 recombination such as non-allelic homologous recombination<sup>45</sup>. However, the  
234 presence of an *AluSz6* element at the distal breakpoints in both cell lines led us to  
235 consider *Alu-Alu*-mediated non-allelic homologous recombination mechanism. For

236 *Alu-Alu*-mediated non-allelic homologous recombination to take place it would  
237 require a second *Alu* element at the proximal breakpoint with high sequence identity  
238 with the distal *Alu*<sup>46</sup>. We found no evidence of a second *Alu* at the proximal  
239 breakpoint in either of our cell lines. Despite this, the presence of *AluSz6* at distal  
240 breakpoints in both cell lines suggests that it might play a role in the initiation of  
241 tandem amplifications, rather than in the mechanism of mutation itself. Inverted  
242 repeats, such as *Alu* elements, form hairpin loop secondary structures that can  
243 impede replication, leading to fork stalling and collapse, particularly under conditions  
244 of replication stress<sup>30-34,47-49</sup>. It is perhaps no coincidence then, that this mechanism  
245 of mutagenesis is associated with high levels of replication stress, which is a  
246 characteristic of human PSC during *in vitro* culture<sup>50-52</sup>.

247

248 The breakpoint signatures of the tandem amplifications characterised in MShf7-A4  
249 and NCRM1 are consistent with the replication template switching mechanisms, fork  
250 stalling and template switching and microhomology mediated break induced  
251 replication, which are initiated by replication fork stalling and collapse,  
252 respectively<sup>13,14</sup>. In the case of fork stalling and template switching, the lagging  
253 strand at the stalled fork disengages and invades another replication fork at a region  
254 of microhomology. Microhomology mediated break induced replication is similar to  
255 fork stalling and template switching, although following a collapsed fork the 5' end of  
256 the DNA break is resected to generate a 3' single-stranded overhang that then  
257 invades a template region with microhomology before replication is reinitiated. If the  
258 template is upstream on the same chromosome or a homologous chromosome, a  
259 tandem amplification would result (**Fig. 4a, b**)<sup>13,14,45,53</sup>. Furthermore, the role of  
260 microhomology mediated break induced replication and fork stalling and template  
261 switching in the formation of tandem triplications has been discussed<sup>14,54-56</sup>. Should  
262 replication fork collapse lead to sister chromatid strand invasion at an upstream  
263 region of microhomology, replication of the amplified segment will proceed. This  
264 could then be followed by a second round of template switching and strand invasion  
265 at the same region of microhomology, although this time into the other parental  
266 homolog with replication proceeding to the distal end of the chromosome, resulting in  
267 a tandem triplication (**Fig. 4a-c**)

268



269 In summary, we provide evidence from breakpoint junctions that implicate  
270 replication-based repair by fork stalling and template switching and microhomology  
271 mediated break induced replication as the mutational mechanism driving tandem  
272 duplication in human PSC. We argue that constitutive replication stress observed  
273 during the *in vitro* culture of human PSC could be driving replication fork stalling and  
274 collapse at *Alu* elements that initiates these mutations. This report provides new  
275 insight into the mechanisms of mutation in human PSC. The recurrent nature of  
276 genetic change in human PSC is considered non-random due to the selection of  
277 advantageous mutations. However, it was recently reported that mutations in human  
278 PSC occur with higher frequency in non-genic regions<sup>57</sup>. The data presented here  
279 complements these findings and suggests that mutation itself may be non-random  
280 but may be enriched at certain sites that can be characterised by the genomic  
281 architecture. By defining these regions, it may be possible to safeguard the genome  
282 stability of human PSC for their use in cell-based regenerative medicine.

283

## 284 **Methods**

285

286 **Human pluripotent stem cell culture.** The MShef7<sup>19,20</sup> (hPSCreg:  
287 <https://hpscereg.eu/cell-line/UOSe012-A>) human ESC line was derived at the  
288 University of Sheffield Centre for Stem Cell Biology under the HFEA licence R0115-  
289 8A (centre 0191) and HTA licence 22510. A mosaic sub-population of chromosome  
290 20 variant cells was detected in a culture of MShef7, which was sub-cloned using  
291 single cell deposition by FACS. The NCRM1<sup>21</sup> (hPSCreg: [https://hpscereg.eu/cell-](https://hpscereg.eu/cell-line/CRMi003-A)  
292 [line/CRMi003-A](https://hpscereg.eu/cell-line/CRMi003-A)) human iPSC line was acquired from RUCDR Infinite Biologics and  
293 was originally derived by reprogramming umbilical cord blood CD34+ cells using a  
294 non-integrating episomal vector. Both cell lines were maintained in culture vessels  
295 coated with a matrix of Vitronectin human recombinant protein (ThermoFisher  
296 Scientific, A14700) and batch fed daily with mTeSR (STEMCELL Technologies,  
297 85850). Once the cells had reached confluency, they were passaged using ReLeSR  
298 (STEMCELL Technologies, 05873) according to manufacturer's guidelines.

299

300 **qPCR breakpoint determination.** DNA was extracted from cell pellets using the  
301 DNeasy Blood and Tissue kit (Qiagen, 69504). DNA quantity and quality were  
302 measured using a NanoPhotometer (Implen). 1µg of DNA was digested with 10 units

303 of FastDigest EcoRI enzyme (Thermo Fisher Scientific, FD0275) in FastDigest buffer  
 304 (Thermo Fisher Scientific, FD0275) for 5 minutes at 37°C, followed by deactivation of  
 305 the enzyme by incubating at 80°C for 5 minutes. qPCR was performed as previously  
 306 described<sup>15,22</sup>, using the adapted protocol<sup>22</sup> whereby primer sets were designed  
 307 along the length of the q arm of chromosome 20 (**Table 1**) to allow an estimate of the  
 308 amplicon length. A 10µl PCR reaction contained TaqMan Fast Universal PCR  
 309 mastermix (ThermoFisher Scientific, 4366072), 0.1 µM Universal probe library  
 310 hydrolysis probe, 0.1 µM each of the forward and reverse primers (**Table 1**) and  
 311 either 20ng of EcoRI-digested DNA or water only (no template control). The PCR  
 312 reactions were run on the QuantStudio 12K Flex Real-Time PCR System using the  
 313 following profile: 50°C for 2 minutes, 95°C for 10 minutes, and 40 cycles of 95°C for  
 314 15 seconds and 60°C for 1 minute. The copy number was determined by first  
 315 subtracting the average Cq values from the test sample 20q loci from the reference  
 316 loci (Chromosome 4p) to obtain a dCq value. The dCq for the calibrator sample at  
 317 the same loci was then calculated in the same way and the test sample dCq and  
 318 calibrator sample dCq were subtracted from one another to give ddCq. The relative  
 319 quantity was calculated as  $2^{-ddCq}$ . Finally, to obtain the copy number, the relative  
 320 quantity value was multiplied by 2.

321

322 **Table 1.** qPCR breakpoint detection primer sets and probes <sup>22</sup>.

| Gene (location)<br>Accession Number                       | Primer sequences (forward<br>and reverse)     | UPL probe number |
|-----------------------------------------------------------|-----------------------------------------------|------------------|
| <i>RELL1</i> (4p14)<br>NC_000004.12                       | tgcttgctcagaaggagctt<br>tgggtcaggaacagagaca   | 12               |
| <i>DEFB115</i> (20q11.21)<br>31,257,664<br>NM_001037730.1 | tcagcctgaacattctggtaaa<br>cactgtctttcccaaactc | 14               |
| <i>REM1</i> (20q11.21)<br>31,475,272<br>NM_014012.5       | ccccttttctcactccacaa<br>tctgcagggggagaagtaca  | 46               |
| <i>TPX2</i> (20q11.21)<br>31,739,101<br>NM_012112.4       | cccccaaatcaggcctac<br>ttaaagcaaaatccaggagtcaa | 35               |
| <i>MYLK2</i> (20q11.21)<br>31,819,375<br>NC_000020.11     | ggtcaggagaaccagagtg<br>gtctcccagggcacttcag    | 16               |

|                                                       |                                                |    |
|-------------------------------------------------------|------------------------------------------------|----|
| <i>XKR7</i> (20q11.21)<br>31,968,002<br>NM_033118.3   | gtgtcttaccggggtcctatc<br>gcctggaaggtgtgcagta   | 3  |
| <i>TM9SF4</i> (20q11.21)<br>32,109,506<br>NM_014742.3 | taatggagccaatgccagta<br>caaaaccagtttctgtgccttt | 45 |
| <i>ASXL1</i> (20q11.21)<br>32,358,062<br>NM_015338.5  | gagtgctactgtggatgggtag<br>ctggcatatggaaccctcac | 13 |

323

324 **Fluorescence *in situ* hybridisation (FISH) for the detection of chromosomal**  
325 **variants.** Human PSC were detached from culture flasks by incubating with TrypLE  
326 Express Enzyme (Fisher Scientific, 11528856) for 3 minutes at 37°C. The cells were  
327 collected in DMEM/F12 basal media (D6421, Sigma Aldrich) and centrifuged at 270  
328 g for 8 minutes. To the cell pellet, 1 mL of pre-warmed 37°C 0.0375 M potassium  
329 chloride was added. The cells were then centrifuged at 270 g for 8 minutes, before  
330 fixing the cells by adding 2 mL fixative (3 parts methanol : 1 part acetic acid, v/v), in a  
331 drop-wise manner under constant agitation. FISH detection of chromosomal variants  
332 was performed by Sheffield Diagnostics Genetic Service. Analysis was performed on  
333 100 interphase nuclei per sample that had been probed with D20S108 (BCL2L1)  
334 probe.

335

336 **DNA extraction for sequencing.** DNA was extracted from cell pellets using the  
337 DNeasy Blood and Tissue kit (Qiagen, 69504). DNA quantity and quality were  
338 measured using a NanoPhotometer (Implen).

339

340 **DNA sequencing.** DNA library preparation was performed using the ligation (Oxford  
341 Nanopore Technologies, SQK-LSK108) or Rapid sequencing kits (Oxford Nanopore  
342 Technologies, SQK-RAD004) according to the manufacturer's Genomic DNA by  
343 Ligation or Rapid Sequencing protocols, respectively. The whole genome libraries  
344 were sequenced using the Oxford Nanopore MinION or GridION sequencers with the  
345 R9.4.1 flow cell (Oxford Nanopore Technologies, FLO-MIN106D) following the  
346 manufacturer's instructions. Each flow cell yielded ~5 Gb of data.

347

348 **Data processing.** Data exported as FASTQ files were mapped to the chromosome  
349 20 hg38 reference sequence using minimap2 sequence aligner (version 2-2.15)<sup>58</sup>.  
350 File management, merging, sorting and indexing was performed using Sambamba  
351 (version 0.6.6) and Samtools (version 1.9)<sup>59,60</sup>. Breakpoint regions were inspected  
352 manually using IGV genomic viewer<sup>61</sup> and the breakpoint location was identified  
353 based on read depth and soft-clipped sequence analysis. Briefly, the aligned and  
354 sorted .bam files were opened using IGV genomic viewer with soft-clipped bases  
355 enabled. The distal breakpoint region identified by qPCR was inspected and the  
356 breakpoint at the single nucleotide level was located by identifying a region of  
357 reduced read depth with soft-clipped reads that spanned the point of reduced read  
358 coverage (**Figure S2A, B**). To identify the proximal breakpoint, the soft-clipped  
359 proportion of the sequencing reads at the distal breakpoint were queried using BLAT  
360 sequence alignment to identify the sequence matches in the human reference  
361 genome with high similarity.

362

## 363 **References**

364

- 365 1 Carvalho, C. M. & Lupski, J. R. Mechanisms underlying structural variant formation  
366 in genomic disorders. *Nat Rev Genet* **17**, 224-238, doi:10.1038/nrg.2015.25 (2016).
- 367 2 Amps, K. *et al.* Screening ethnically diverse human embryonic stem cells identifies a  
368 chromosome 20 minimal amplicon conferring growth advantage. *Nat Biotechnol* **29**,  
369 1132-1144, doi:10.1038/nbt.2051 (2011).
- 370 3 Lefort, N. *et al.* Human embryonic stem cells reveal recurrent genomic instability at  
371 20q11.21. *Nat Biotechnol* **26**, 1364-1366, doi:10.1038/nbt.1509 (2008).
- 372 4 Werbowetski-Ogilvie, T. E. *et al.* Characterization of human embryonic stem cells  
373 with features of neoplastic progression. *Nat Biotechnol* **27**, 91-97,  
374 doi:10.1038/nbt.1516 (2009).
- 375 5 Nguyen, H. T. *et al.* Gain of 20q11.21 in human embryonic stem cells improves cell  
376 survival by increased expression of Bcl-xL. *Mol Hum Reprod* **20**, 168-177,  
377 doi:10.1093/molehr/gat077 (2014).
- 378 6 Avery, S. *et al.* BCL-XL mediates the strong selective advantage of a 20q11.21  
379 amplification commonly found in human embryonic stem cell cultures. *Stem Cell*  
380 *Reports* **1**, 379-386, doi:10.1016/j.stemcr.2013.10.005 (2013).
- 381 7 Markouli, C. *et al.* Gain of 20q11.21 in Human Pluripotent Stem Cells Impairs TGF-  
382  $\beta$ -Dependent Neuroectodermal Commitment. *Stem Cell Reports* **13**, 163-176,  
383 doi:10.1016/j.stemcr.2019.05.005 (2019).
- 384 8 Beroukhim, R. *et al.* The landscape of somatic copy-number alteration across human  
385 cancers. *Nature* **463**, 899-905, doi:10.1038/nature08822 (2010).
- 386 9 Sishc, B. J. & Davis, A. J. The Role of the Core Non-Homologous End Joining  
387 Factors in Carcinogenesis and Cancer. *Cancers (Basel)* **9**,  
388 doi:10.3390/cancers9070081 (2017).

- 389 10 Toffolatti, L. *et al.* Investigating the mechanism of chromosomal deletion:  
390 characterization of 39 deletion breakpoints in introns 47 and 48 of the human  
391 dystrophin gene. *Genomics* **80**, 523-530 (2002).
- 392 11 Inoue, K. *et al.* Genomic rearrangements resulting in PLP1 deletion occur by  
393 nonhomologous end joining and cause different dysmyelinating phenotypes in males  
394 and females. *Am J Hum Genet* **71**, 838-853, doi:10.1086/342728 (2002).
- 395 12 Gunning, A. C. *et al.* Recurrent De Novo NAHR Reciprocal Duplications in the  
396 ATAD3 Gene Cluster Cause a Neurogenetic Trait with Perturbed Cholesterol and  
397 Mitochondrial Metabolism. *Am J Hum Genet* **106**, 272-279,  
398 doi:10.1016/j.ajhg.2020.01.007 (2020).
- 399 13 Lee, J. A., Carvalho, C. M. & Lupski, J. R. A DNA replication mechanism for  
400 generating nonrecurrent rearrangements associated with genomic disorders. *Cell* **131**,  
401 1235-1247, doi:10.1016/j.cell.2007.11.037 (2007).
- 402 14 Hastings, P. J., Ira, G. & Lupski, J. R. A microhomology-mediated break-induced  
403 replication model for the origin of human copy number variation. *PLoS Genet* **5**,  
404 e1000327, doi:10.1371/journal.pgen.1000327 (2009).
- 405 15 Baker, D. *et al.* Detecting Genetic Mosaicism in Cultures of Human Pluripotent Stem  
406 Cells. *Stem Cell Reports* **7**, 998-1012, doi:10.1016/j.stemcr.2016.10.003 (2016).
- 407 16 Yoon, S., Xuan, Z., Makarov, V., Ye, K. & Sebat, J. Sensitive and accurate detection  
408 of copy number variants using read depth of coverage. *Genome Res* **19**, 1586-1592,  
409 doi:10.1101/gr.092981.109 (2009).
- 410 17 De Coster, W. & Van Broeckhoven, C. Newest Methods for Detecting Structural  
411 Variations. *Trends Biotechnol* **37**, 973-982, doi:10.1016/j.tibtech.2019.02.003 (2019).
- 412 18 Chaisson, M. J., Wilson, R. K. & Eichler, E. E. Genetic variation and the de novo  
413 assembly of human genomes. *Nat Rev Genet* **16**, 627-640, doi:10.1038/nrg3933  
414 (2015).
- 415 19 Merkle, F. T. *et al.* Human pluripotent stem cells recurrently acquire and expand  
416 dominant negative P53 mutations. *Nature* **545**, 229-233, doi:10.1038/nature22312  
417 (2017).
- 418 20 Canham, M. A. *et al.* The Molecular Karyotype of 25 Clinical-Grade Human  
419 Embryonic Stem Cell Lines. *Sci Rep* **5**, 17258, doi:10.1038/srep17258 (2015).
- 420 21 de Graaf, M. N. S. *et al.* Scalable microphysiological system to model three-  
421 dimensional blood vessels. *APL Bioeng* **3**, 026105, doi:10.1063/1.5090986 (2019).
- 422 22 Laing, O., Halliwell, J. & Barbaric, I. Rapid PCR Assay for Detecting Common  
423 Genetic Variants Arising in Human Pluripotent Stem Cell Cultures. *Curr Protoc Stem*  
424 *Cell Biol* **49**, e83, doi:10.1002/cpsc.83 (2019).
- 425 23 Schneider, V. A. *et al.* Evaluation of GRCh38 and de novo haploid genome  
426 assemblies demonstrates the enduring quality of the reference assembly. *Genome Res*  
427 **27**, 849-864, doi:10.1101/gr.213611.116 (2017).
- 428 24 Korbel, J. O. *et al.* Paired-end mapping reveals extensive structural variation in the  
429 human genome. *Science* **318**, 420-426, doi:10.1126/science.1149504 (2007).
- 430 25 Chiang, D. Y. *et al.* High-resolution mapping of copy-number alterations with  
431 massively parallel sequencing. *Nat Methods* **6**, 99-103, doi:10.1038/nmeth.1276  
432 (2009).
- 433 26 Li, H. & Durbin, R. Fast and accurate short read alignment with Burrows-Wheeler  
434 transform. *Bioinformatics* **25**, 1754-1760, doi:10.1093/bioinformatics/btp324 (2009).
- 435 27 Li, H. & Durbin, R. Fast and accurate long-read alignment with Burrows-Wheeler  
436 transform. *Bioinformatics* **26**, 589-595, doi:10.1093/bioinformatics/btp698 (2010).
- 437 28 Kent, W. J. BLAT--the BLAST-like alignment tool. *Genome Res* **12**, 656-664,  
438 doi:10.1101/gr.229202 (2002).

- 439 29 Hubley, R. *et al.* The Dfam database of repetitive DNA families. *Nucleic Acids*  
440 *Research* **44**, D81-D89, doi:10.1093/nar/gkv1272 (2015).
- 441 30 Lobachev, K. S. *et al.* Factors affecting inverted repeat stimulation of recombination  
442 and deletion in *Saccharomyces cerevisiae*. *Genetics* **148**, 1507-1524 (1998).
- 443 31 Lobachev, K. S., Gordenin, D. A. & Resnick, M. A. The Mre11 complex is required  
444 for repair of hairpin-capped double-strand breaks and prevention of chromosome  
445 rearrangements. *Cell* **108**, 183-193, doi:10.1016/s0092-8674(02)00614-1 (2002).
- 446 32 Narayanan, V., Mieczkowski, P. A., Kim, H. M., Petes, T. D. & Lobachev, K. S. The  
447 pattern of gene amplification is determined by the chromosomal location of hairpin-  
448 capped breaks. *Cell* **125**, 1283-1296, doi:10.1016/j.cell.2006.04.042 (2006).
- 449 33 Lobachev, K. S., Rattray, A. & Narayanan, V. Hairpin- and cruciform-mediated  
450 chromosome breakage: causes and consequences in eukaryotic cells. *Front Biosci* **12**,  
451 4208-4220, doi:10.2741/2381 (2007).
- 452 34 Voineagu, I., Narayanan, V., Lobachev, K. S. & Mirkin, S. M. Replication stalling at  
453 unstable inverted repeats: interplay between DNA hairpins and fork stabilizing  
454 proteins. *Proc Natl Acad Sci U S A* **105**, 9936-9941, doi:10.1073/pnas.0804510105  
455 (2008).
- 456 35 Lieber, M. R. The mechanism of double-strand DNA break repair by the  
457 nonhomologous DNA end-joining pathway. *Annu Rev Biochem* **79**, 181-211,  
458 doi:10.1146/annurev.biochem.052308.093131 (2010).
- 459 36 Pannunzio, N. R., Li, S., Watanabe, G. & Lieber, M. R. Non-homologous end joining  
460 often uses microhomology: implications for alternative end joining. *DNA Repair*  
461 (*Amst*) **17**, 74-80, doi:10.1016/j.dnarep.2014.02.006 (2014).
- 462 37 Symington, L. S. Role of RAD52 epistasis group genes in homologous recombination  
463 and double-strand break repair. *Microbiol Mol Biol Rev* **66**, 630-670, table of  
464 contents, doi:10.1128/mmbr.66.4.630-670.2002 (2002).
- 465 38 Motycka, T. A., Bessho, T., Post, S. M., Sung, P. & Tomkinson, A. E. Physical and  
466 functional interaction between the XPF/ERCC1 endonuclease and hRad52. *J Biol*  
467 *Chem* **279**, 13634-13639, doi:10.1074/jbc.M313779200 (2004).
- 468 39 Sfeir, A. & Symington, L. S. Microhomology-Mediated End Joining: A Back-up  
469 Survival Mechanism or Dedicated Pathway? *Trends Biochem Sci* **40**, 701-714,  
470 doi:10.1016/j.tibs.2015.08.006 (2015).
- 471 40 Sinha, S., Villarreal, D., Shim, E. Y. & Lee, S. E. Risky business: Microhomology-  
472 mediated end joining. *Mutat Res* **788**, 17-24, doi:10.1016/j.mrfmmm.2015.12.005  
473 (2016).
- 474 41 Wang, H. & Xu, X. Microhomology-mediated end joining: new players join the team.  
475 *Cell Biosci* **7**, 6, doi:10.1186/s13578-017-0136-8 (2017).
- 476 42 Black, S. J., Kashkina, E., Kent, T. & Pomerantz, R. T. DNA Polymerase  $\theta$ : A Unique  
477 Multifunctional End-Joining Machine. *Genes (Basel)* **7**, doi:10.3390/genes7090067  
478 (2016).
- 479 43 Chang, H. H. Y., Pannunzio, N. R., Adachi, N. & Lieber, M. R. Non-homologous  
480 DNA end joining and alternative pathways to double-strand break repair. *Nat Rev Mol*  
481 *Cell Biol* **18**, 495-506, doi:10.1038/nrm.2017.48 (2017).
- 482 44 Arlt, M. F., Rajendran, S., Birkeland, S. R., Wilson, T. E. & Glover, T. W. De novo  
483 CNV formation in mouse embryonic stem cells occurs in the absence of Xrcc4-  
484 dependent nonhomologous end joining. *PLoS Genet* **8**, e1002981,  
485 doi:10.1371/journal.pgen.1002981 (2012).
- 486 45 Gu, W., Zhang, F. & Lupski, J. R. Mechanisms for human genomic rearrangements.  
487 *Pathogenetics* **1**, 4, doi:10.1186/1755-8417-1-4 (2008).

- 488 46 Shaw, C. J. & Lupski, J. R. Non-recurrent 17p11.2 deletions are generated by  
489 homologous and non-homologous mechanisms. *Hum Genet* **116**, 1-7,  
490 doi:10.1007/s00439-004-1204-9 (2005).
- 491 47 Barlow, J. H. *et al.* Identification of early replicating fragile sites that contribute to  
492 genome instability. *Cell* **152**, 620-632, doi:10.1016/j.cell.2013.01.006 (2013).
- 493 48 Mortusewicz, O., Herr, P. & Helleday, T. Early replication fragile sites: where  
494 replication-transcription collisions cause genetic instability. *EMBO J* **32**, 493-495,  
495 doi:10.1038/emboj.2013.20 (2013).
- 496 49 Arlt, M. F. *et al.* Replication stress induces genome-wide copy number changes in  
497 human cells that resemble polymorphic and pathogenic variants. *Am J Hum Genet* **84**,  
498 339-350, doi:10.1016/j.ajhg.2009.01.024 (2009).
- 499 50 Ahuja, A. K. *et al.* A short G1 phase imposes constitutive replication stress and fork  
500 remodelling in mouse embryonic stem cells. *Nat Commun* **7**, 10660,  
501 doi:10.1038/ncomms10660 (2016).
- 502 51 Halliwell, J. A. *et al.* Nucleosides rescue replication-mediated genome instability of  
503 human pluripotent stem cells. *bioRxiv*, 853234, doi:10.1101/853234 (2019).
- 504 52 Vallabhaneni, H. *et al.* High Basal Levels of  $\gamma$ H2AX in Human Induced Pluripotent  
505 Stem Cells Are Linked to Replication-Associated DNA Damage and Repair. *Stem*  
506 *Cells* **36**, 1501-1513, doi:10.1002/stem.2861 (2018).
- 507 53 Sahoo, T. *et al.* Concurrent triplication and uniparental isodisomy: evidence for  
508 microhomology-mediated break-induced replication model for genomic  
509 rearrangements. *Eur J Hum Genet* **23**, 61-66, doi:10.1038/ejhg.2014.53 (2015).
- 510 54 Zhang, F. *et al.* The DNA replication FoSTeS/MMBIR mechanism can generate  
511 genomic, genic and exonic complex rearrangements in humans. *Nat Genet* **41**, 849-  
512 853, doi:10.1038/ng.399 (2009).
- 513 55 Zhang, F., Carvalho, C. M. & Lupski, J. R. Complex human chromosomal and  
514 genomic rearrangements. *Trends Genet* **25**, 298-307, doi:10.1016/j.tig.2009.05.005  
515 (2009).
- 516 56 Hastings, P. J., Lupski, J. R., Rosenberg, S. M. & Ira, G. Mechanisms of change in  
517 gene copy number. *Nat Rev Genet* **10**, 551-564, doi:10.1038/nrg2593 (2009).
- 518 57 Thompson, O. *et al.* Low rates of mutation in clinical grade human pluripotent stem  
519 cells under different culture conditions. *Nature Communications* **11**, 1528,  
520 doi:10.1038/s41467-020-15271-3 (2020).
- 521 58 Li, H. Minimap2: pairwise alignment for nucleotide sequences. *Bioinformatics* **34**,  
522 3094-3100, doi:10.1093/bioinformatics/bty191 (2018).
- 523 59 Li, H. *et al.* The Sequence Alignment/Map format and SAMtools. *Bioinformatics* **25**,  
524 2078-2079, doi:10.1093/bioinformatics/btp352 (2009).
- 525 60 Tarasov, A., Vilella, A. J., Cuppen, E., Nijman, I. J. & Prins, P. Sambamba: fast  
526 processing of NGS alignment formats. *Bioinformatics* **31**, 2032-2034,  
527 doi:10.1093/bioinformatics/btv098 (2015).
- 528 61 Robinson, J. T. *et al.* Integrative genomics viewer. *Nat Biotechnol* **29**, 24-26,  
529 doi:10.1038/nbt.1754 (2011).

530  
531

## 532 **Acknowledgements**

533 The authors would like to thank Matthew Parker, Emily Chambers and Mark  
534 Dunning of the Sheffield Bioinformatics Core, The University of Sheffield for  
535 assistance and advice with performing the data processing. This work was partly

536 funded by the European Union's Horizon 2020 research and innovation program  
537 under grant agreement No. 668724 and partly by the UK Regenerative Medicine  
538 Platform, MRC reference MR/R015724/1. The Wellcome Sanger Institute is grateful  
539 for the Wellcome Trust general core grant number 206194.

540

#### 541 **Author Contribution**

542 PWA and IB oversaw the project. JAH, PWA and IB devised the experimental  
543 design. JAH performed the cell culture, DNA extraction, qPCR and data processing.  
544 Additional help for data processing was provided by the Sheffield Bioinformatics  
545 Core. DB performed interphase FISH detection of chromosome 20 amplification. KJ,  
546 MAQ, KO, EB and JS performed the Nanopore library preparation and whole  
547 genome sequencing. The manuscript was drafted by JAH, PWA and IB.

548

#### 549 **Competing interest**

550 The authors declare no competing financial interests.

551

552 **Figure 1 | qPCR detection of distal breakpoint positions. a,** A schematic showing  
553 the position and order of genes probed by qPCR along the chromosome 20q11.21.  
554 Primer sets were designed to target intronic regions of the genes displayed. **b,** Copy  
555 number values for the human ESC line MShef7-A4, determined by qPCR for loci  
556 along the length of chromosome 20q11.21. The primer location according to the  
557 hg38 reference genome are also displayed with the gene names along the X axis. **c,**  
558 The qPCR determined copy number for loci along the length of chromosome  
559 20q11.21 in the NCRM1 human iPSC line. The copy number of four between  
560 *DEFB115* and *TPX2* indicates a triplication of this region.

561

562 **Figure 2 | Breakpoint junction detection in MShef7-A4 using Nanopore**  
563 **sequencing. a,** Sequencing read coverage of 30 kb spanning the breakpoint  
564 junction at 32,273,600 bp (chromosome 20q11.21) of the hg38 reference genome.  
565 Each dot indicates the read depth at a single base pair position. The red and blue  
566 lines indicate the mean read depth before and after the breakpoint position,  
567 respectively **b,** Schematic of the reference genome and the tandem duplication  
568 detected in MShef7-A4. Junction between genome segment A-B and B-C represents  
569 the proximal and distal breakpoint, respectively. The position of genes flanking and



570 the location of the *AluSz6* in relation to the breakpoint are depicted. **c**, Reference  
571 sequence spanning the distal breakpoint (B – top, green), sequence of the  
572 breakpoint junction (B/B fusion– middle) and the contig sequence of the distal side of  
573 the proximal breakpoint (B – bottom, blue). The regions of microhomology that flank  
574 the proximal and distal breakpoint is highlighted (red).

575

576 **Figure 3 | Breakpoint position of the tandem triplication in NCRM1.** **a**, Read  
577 coverage of 30 kb surrounding the breakpoint junction 31,813,288 bp (chromosome  
578 20q11.21) of the hg38 reference genome. The mean read depth before and after the  
579 breakpoint is shown (red line and blue line, respectively). **b**, Schematic depicting the  
580 reference genome and the NCRM1 tandem triplication. The distal breakpoint lies  
581 between the junction of B-C and the proximal breakpoint is located on the boundary  
582 of the A-B segments. The genes flanking the breakpoint, as determined by qPCR are  
583 depicted. The position of the *AluSz6* identified from the Dfam database is  
584 represented above the reference sequence schematic. The exact nucleotide position  
585 of the proximal and distal breakpoint is written above the schematic of the tandem  
586 triplication. **c**, Reference sequence spanning the distal breakpoint (B – top, green),  
587 the proximal breakpoint (B – bottom, blue) and the combined amplification  
588 breakpoint junction (B/B fusion – middle). The region of microhomology that flanks  
589 each of the breakpoints is highlighted (red).

590

591 **Figure 4 | Replication template switching is responsible for tandem**  
592 **amplification in human PSC.** **a**, Replication fork stalling is promoted by *Alu*  
593 sequences that form hairpin loops. **b**, Replication fork repair by fork stalling and  
594 template switching and/or microhomology mediated break induced replication is  
595 initiated by strand invasion at a site of microhomology in the pericentromeric  
596 microsatellite on the sister chromatid. Replication proceeds, duplicating 20q11.21. **c**,  
597 An additional round of strand invasion and re-synthesis occurs of the other parent  
598 homolog in examples of tandem triplication.

599

a

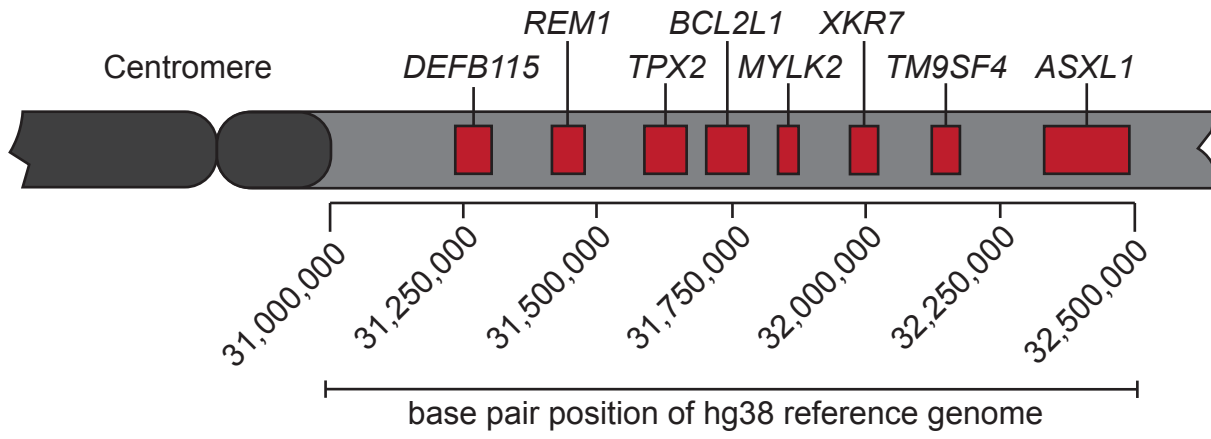

b

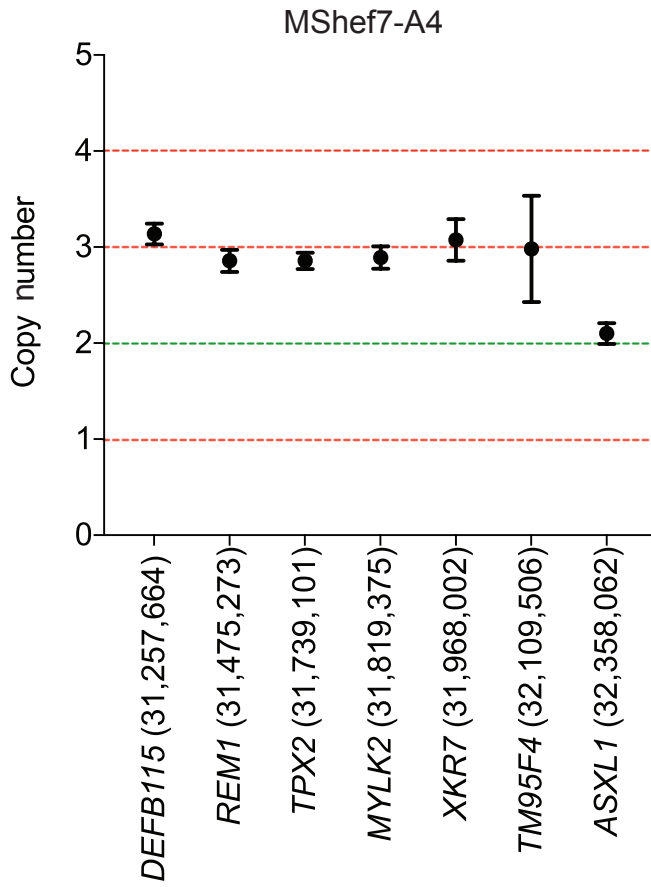

c

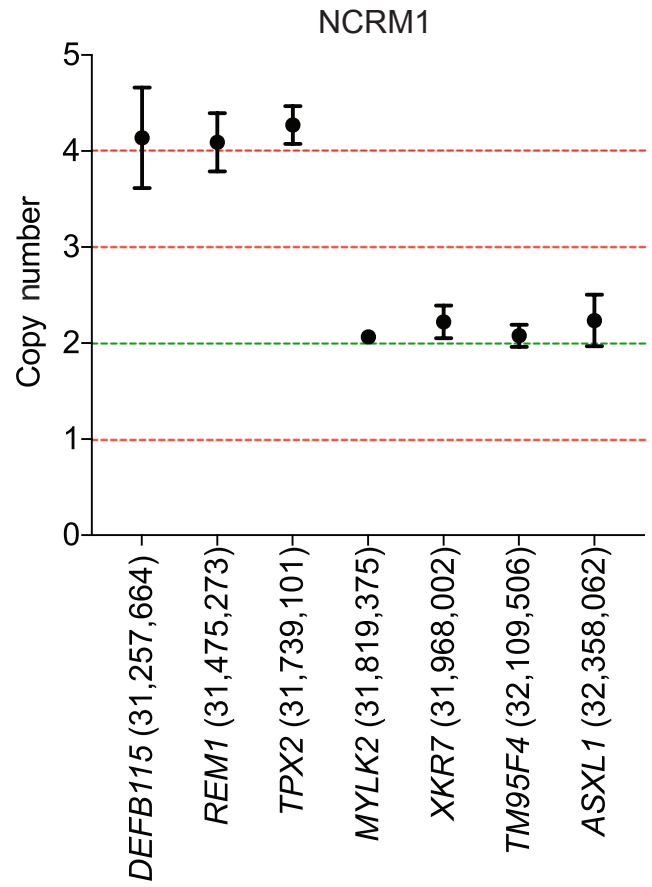

**a**

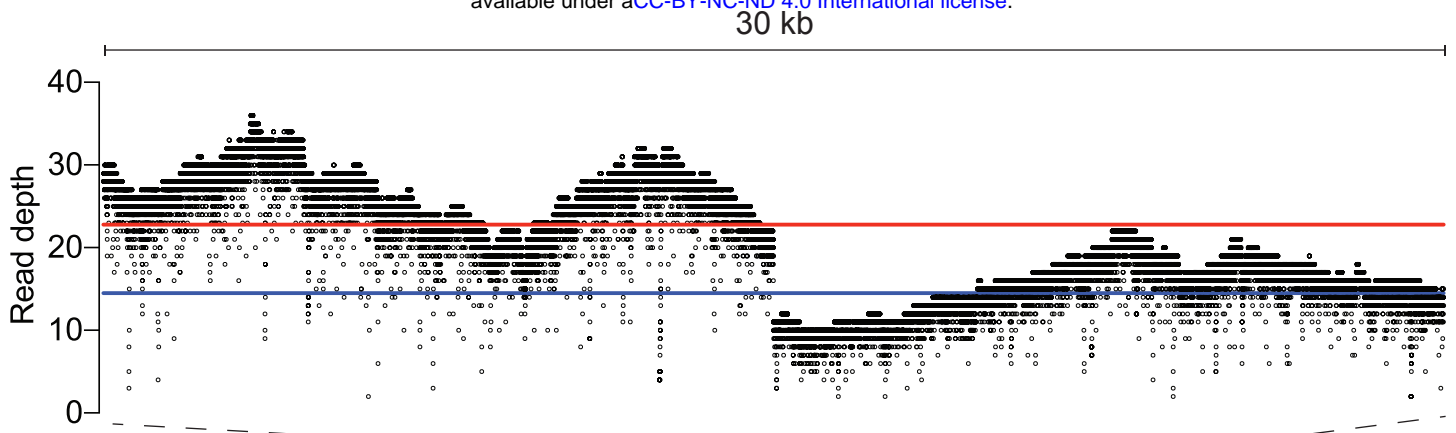

**b**

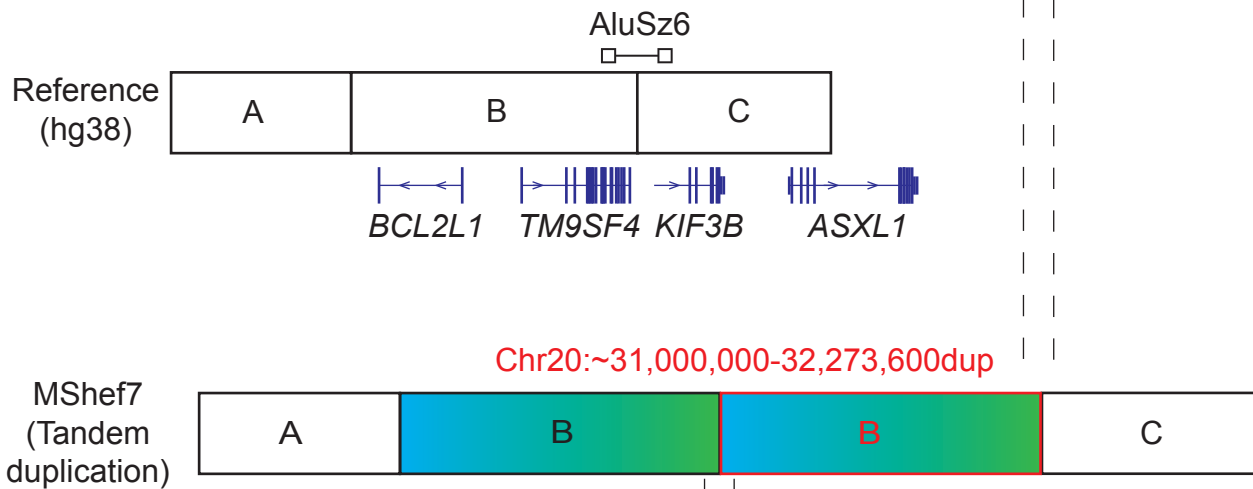

**c**

Breakpoint

A: TGAGAATCACTTAAACCGGGAGGT AGAGGTTGCAGTGAGCTGAGATTGC

B/B fusion: TGAGAATCACTTAAACCGGGAGGT TTAAGAATCACTTAAACCGAAAGGAA

B: TTAAGAATCACTTAAACCGAAAGGAA

**a**

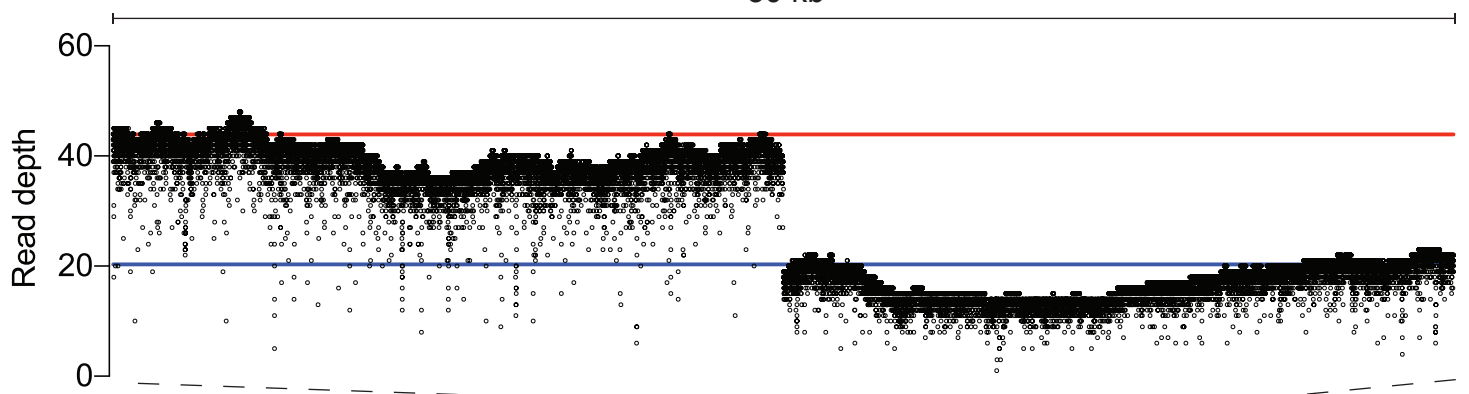

**b**

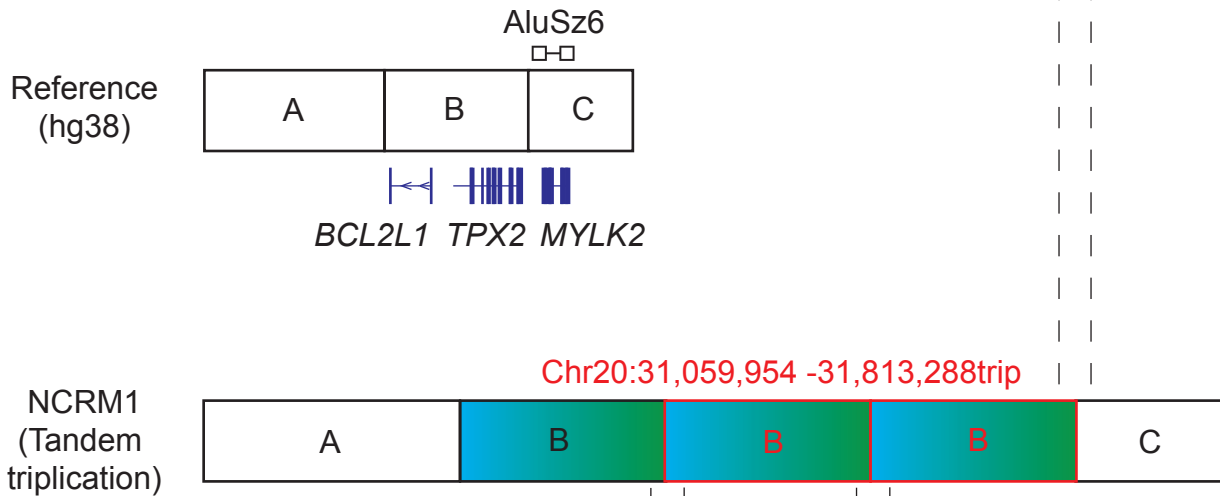

**c**

Breakpoint

↓

B: GGCATTCAAGGGAAACAGAAATTG AAGTTTCTGGCTGGGCGCAGTGGCT

B/B fusion: GGCATTCAAGGGAAACAGAAATTG TGAATAGAATTGAATGGAATTGAATG

B: TGAATGGAATGGAATCAACCAGAG TGAATAGAATTGAATGGAATTGAATG

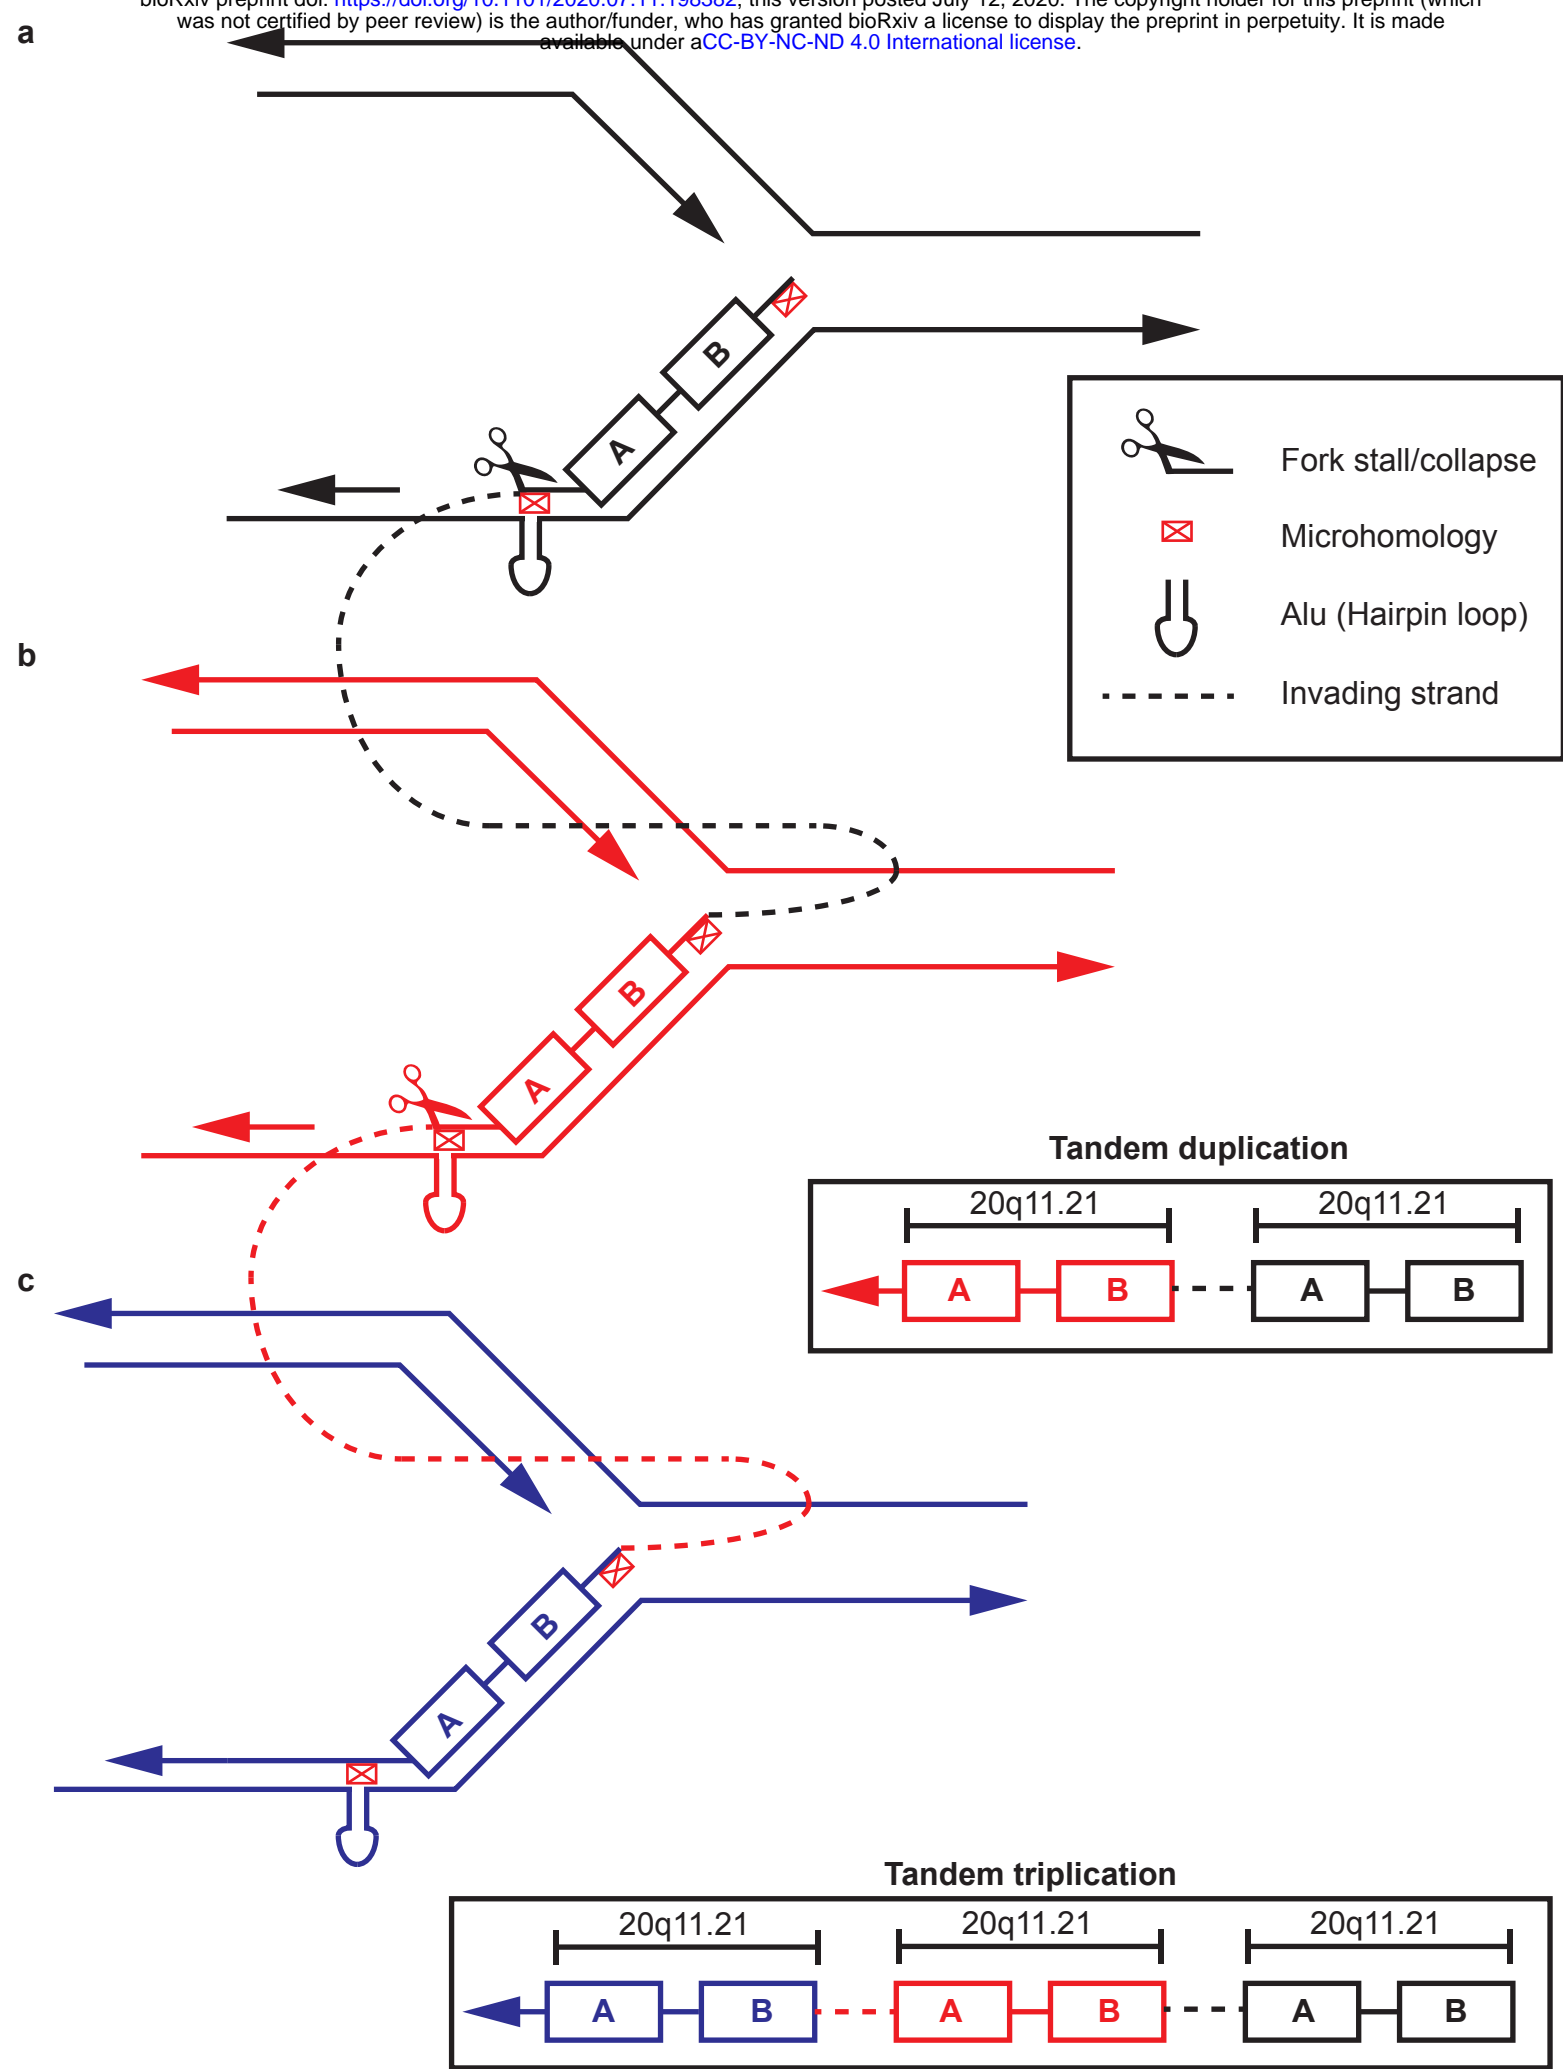

Source: https://www.biorxiv.org/content/biorxiv/early/2020/07/12/2020.07.11.198382.full.pdf
